# Supplementary material for: Effect of Pressure, Reconstituted RTE Meat Microbiota, and Antimicrobials on Survival and Post-pressure Growth of Listeria monocytogenes on Ham
Source: PubMed Central journal article supplement (PMC6119701; doi:10.3389/fmicb.2018.01979), 2018-08-27
Supplement: Data_Sheet_1.pdf [file Data_Sheet_1.pdf]

**Effect of pressure, meat microbiota, and antimicrobials on survival and post-pressure growth of *Listeria monocytogenes* on ham**

Januana S. Teixeira, Lenka Repková, Lynn M. McMullen, Michael G. Gänzle<sup>§</sup>

University of Alberta, Department of Agricultural, Food and Nutritional Science, Edmonton, Canada

**Online supplementary material.**

**Table S1.** Relative abundance (%) of *L. monocytogenes* and reconstituted meat microbiota on ham after high-pressure treatment at 500 MPa for 1 or 3 min following storage for 4 weeks at 4 °C.

**Figure S1.** Effect of pressure on survival and post-pressure growth of *L. monocytogenes* or reconstituted microbiota on ham (inoculum only).

**Figure S2.** Effect of pressure and reconstituted meat microbiota on survival and post-pressure growth of *L. monocytogenes* on ham (inoculum only).

**Table S1.** Relative abundance (%) of *L. monocytogenes* and non-pathogenic meat microbiota on ham after high-pressure treatment at 500 MPa for 1 or 3 min following storage for 4 weeks at 4 °C. Data are shown as means  $\pm$  standard deviations of triplicate independent experiments.

| Samples               | Meat Microbiota |                  |                   | <i>Listeria</i> and Meat Microbiota |                  |                  |                   |
|-----------------------|-----------------|------------------|-------------------|-------------------------------------|------------------|------------------|-------------------|
|                       | Treatments      | No HP            | 1 min             | 3 min                               | No HP            | 1 min            | 3 min             |
| <b>Organisms</b>      |                 |                  |                   |                                     |                  |                  |                   |
| <i>Brochothrix</i>    |                 | 51.57 $\pm$ 2.65 | 71.68 $\pm$ 16.15 | 75.62 $\pm$ 4.72                    | 50.54 $\pm$ 5.16 | 58.40 $\pm$ 8.81 | 76.78 $\pm$ 10.04 |
| <i>Carnobacterium</i> |                 | 14.58 $\pm$ 1.73 | 3.45 $\pm$ 1.28   | 9.17 $\pm$ 2.84                     | 14.01 $\pm$ 0.83 | 4.65 $\pm$ 4.88  | 8.81 $\pm$ 6.29   |
| <i>Leuconostoc</i>    |                 | 25.54 $\pm$ 4.70 | 23.21 $\pm$ 14.63 | 11.35 $\pm$ 3.33                    | 26.35 $\pm$ 5.54 | 31.01 $\pm$ 9.98 | 10.51 $\pm$ 4.54  |
| <i>Lactobacillus</i>  |                 | 8.11 $\pm$ 0.84  | 1.54 $\pm$ 0.56   | 3.70 $\pm$ 1.16                     | 8.21 $\pm$ 0.39  | 1.93 $\pm$ 1.86  | 3.40 $\pm$ 2.02   |
| <i>Listeria</i>       |                 | 0.04 $\pm$ 0.01  | 0.03 $\pm$ 0.01   | 0.03 $\pm$ 0.02                     | 0.80 $\pm$ 0.23  | 0.49 $\pm$ 0.26  | 0.32 $\pm$ 0.26   |

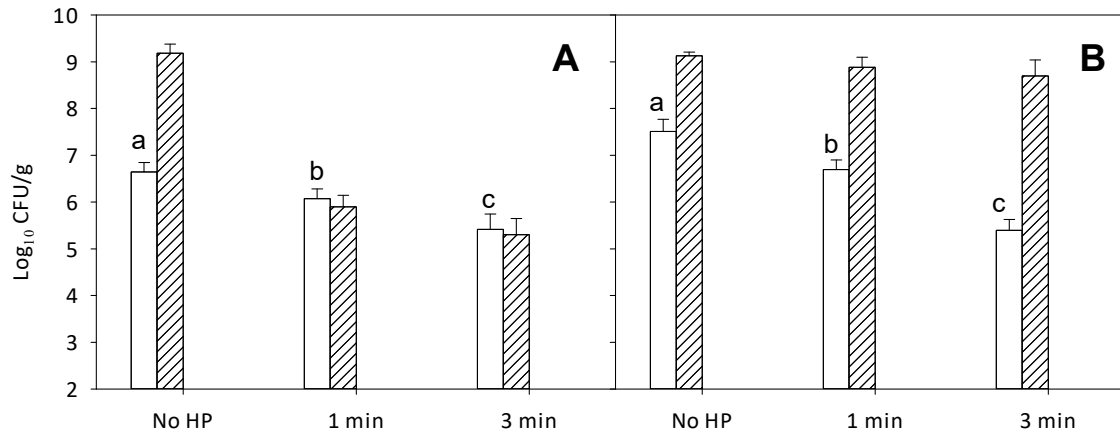

**Figure S1.** Effect of pressure on survival and post-pressure growth of *L. monocytogenes* or competitive microbiota on ham (inoculum only). Shown are the total CFU/g of ham inoculated with *L. monocytogenes* (A) and reconstituted meat microbiota (B) with or without pressure treatment at 500 MPa for 1 or 3 min. The presence or absence of *L. monocytogenes* and competitive microbiota was monitored immediately after pressure treatment (solid columns) and after storage for 4 weeks at 4 °C (patterned columns). Surviving cells were enumerated by surface plating on nonselective TS (*L. monocytogenes*) or APT agar (competitive microbiota) for the determination of viable and sublethally injured cells. Appropriate dilutions were plated and incubated at 37 (TS agar) or 25 °C (APT agar) for 48 h. Data are shown as means  $\pm$  standard deviations of triplicate independent experiments. Treatment means (solid columns) within each panel with different letters are significantly different ( $P < 0.05$ ). The interception point of abscissa and ordinate represents the highest detection limit.

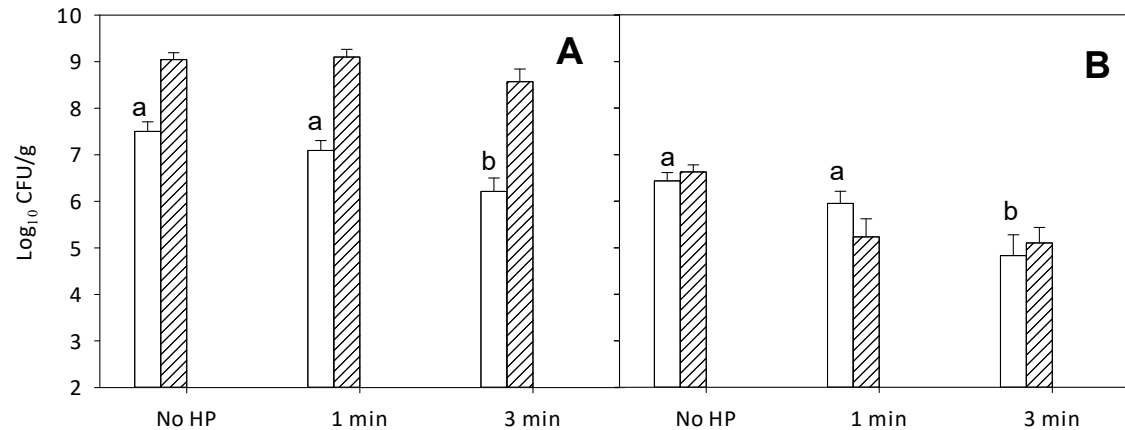

**Figure S2.** Effect of pressure and reconstituted meat microbiota on survival and post-pressure growth of *L. monocytogenes* on ham (inoculum only). Cell counts were enumerated nonselective TS agar (**Panel A**) and on PALCAM agar selective for *L. monocytogenes* (**Panel B**) in untreated samples or after pressure treatment at 500 MPa for 1 or 3 min. Cell counts were monitored immediately after pressure treatment (solid columns) and after storage for 4 weeks at 4 °C (patterned columns). Appropriate dilutions were plated and incubated at 37 °C for 48 h. Data are shown as means  $\pm$  standard deviations of triplicate independent experiments. Treatment means (solid columns) within each panel with different letters are significantly different ( $P < 0.05$ ). The interception point of abscissa and ordinate represents the highest detection limit.
